# Supplementary material
Source: MDPI journal article supplement (https://www.mdpi.com/2073-445X/11/7/1024)
Supplement: s1 [file s1]

Archive with 4 entries (4 files):
- Annex_A_Criteria trees.xlsx
- Annex_B_Equations.pdf
- Annex_C.tif
- Annex_D.tif
