# Supplementary material
Source: MDPI journal article supplement (https://www.mdpi.com/2073-445X/11/7/1024)
Supplement: s1 [file s1 › Annex_A_Criteria trees.xlsx]

## Sheet: CRITERIA TREES
AIM	WEIGHTS	SUB-FUNDAMENTAL	WEIGHTS	CRITERIA CLUSTER	WEIGHTS	CRITERIA	WEIGHTS	Cost/ Benefit FUNCION	ATTRIBUTES	GIS PROCESSING	DataBase
FUNDAMENTAL 1	0.4	STRENGTHS	0.21	ACCESSIBILITY	1	Accessibility factors	0.38	B	Trail density	Line density	Map PdP n° A12.2 Map PdP n° A13.1
							0.31	B	Equipped areas	Buffer (25m)	Map PdP n° P1.1.12
							0.31	B	Recreational attitudes	Reclassify-Extract	Map PdP n° P2.2c Map PdP n° A8.4
			0.08	VALUABLE ELEMENTS	0.5	Landscape	0.25	B	Panoramic viewshed	Viewshed Buffer	DEM5m Map View points Map coast line
							0.5	B	Panoramic viewpoints	Point Kernel Density Buffer	Map PdP n° A11.1 Map PdP n° A11.3
							0.25	B	Main crater cone	Extract	Map DEM 5m
					0.5	Historical and cultural heritage	0.33	B	Punctual elements	Extract	Map PdP n° A11.3 Map PdP n° A11.6
							0.33	B	Linear elements	Line - Density	Map PdP n° A11.1 Map PdP n° A11.3 Map PdP n° A11.6
							0.33	B	Polygonal elements	Polygon - Distance	Map PdP n° A11.1 Map PdP n° A11.2 Map PdP n° A11.3
			0.1	PROTECTED AREAS MANAGEMENT	1	Nature protection system	0.33	B	Protected natural areas	Extract Overlay Union	Map PdP n° P.22b Map PdP n° P.22d
							0.67	B	Park zoning	Reclassify	Map PdP n° P.22b Map PdP n° P.22d
	0.3	PRESSURES	0.15	ANTHROPIC ELEMENTS	0.45	Transport facilities	0.11	B	Main roads network	Distance	Railways and roads Campania Region geoportale
							0.33	C	Local roads network	Distance	Roads Campania Region geoportale
							0.22	C	Airports and harbors	Distance	Urban Atlas website: http://www.portiditalia.it/porti-in-campania/
							0.33	B	Railway stations and motorway exits	Distance	Urban Atlas, classi 12100 e 13100 SIN Litorale Vesuviano database
					0.11	Industry, services and mining	1	B	Industrial and commecial settlemens, dumps and quarries	Distance	Urban Atlas, classi 12100 e 13100 SIN Litorale Vesuviano database ARPAC database
					0.11	Urban areas	1	B	Built-up residential areas	Distance	Urban Atlas, classi 12100 e 13100 Corine Land Cover 2012 and 2018
					0.22	Turism	1	B	Accommodations and catering	Density	9° Census of the tertiary sector
					0.11	Population	0.5	C	Absolute population	Join	ISTAT - 11° Population Census (2011) Administrative Boundary - Campania Region geoportale Corine Land Cover 2012 and 2018
							0.5	C	Human index	Density - Human index (Kernel Density)	ISTAT - 11° Population Census (2011) Administrative Boundary - Campania Region geoportale CTR 2005 (Regional technical Map)
	0.3	SAFETY FACTORS	0.26	WILDFIRES	1	Wildfires	0.61	C	Post-fire Tree stability	Flow Direction	DEM5m Map PdP n° A12.2 Map PdP n° A13.1
							0.28	C	Re-burning probability	Processed by Hydrologists team	Processed by Hydrologists team
							0.11	C	Potential intensity	Processed by Hydrologists team	Processed by Hydrologists team
			0.21	POST-FIRE HYDROGEOLOGICAL HAZARD	1	Hydrogeological hazard	0.8	C	Post-fire erosion hazard	Processed by Hydrologists team	Processed by Hydrologists team
							0.2	C	Upstream and downstream areas of trails	Mosaic - Slope - Flow Direction - UP-stream	DEM5m area Vesuvio Flow Direction Map PdP n° A12.2 Map PdP n° A13.1
FUNDAMENTAL 2	0.5	THREATS	0.27	ANTHOPIC	0.21	Population	0.5	C	Absolute population	Join	ISTAT - 11° Population Census (2011) Administrative Boundary - Campania Region geoportale Corine Land Cover 2012 and 2018
							0.5	C	Human index	Density - Human index (Kernel Density)	ISTAT - 11° Population Census (2011) Administrative Boundary - Campania Region geoportale CTR 2005 (Regional technical Map)
					0.07	Transport facilities	0.8	C	Main roads network	Distance	Railways and roads Campania Region geoportale
							0.2	B	Local roads network	Distance	Roads Campania Region geoportale
					0.07	Tourism	1	C	Accommodations and catering	Density	Park trails
					0.03	Urban areas	1	B	Built-up residential areas	Distance	Urban Atlas, classes 12100 e 13100 CLC18
					0.14	Industry	1	B	Industrial and commercial settlements	Distance	Urban Atlas, classes 12100 e 13100 archivio del SIN Litorale Vesuviano ARPAC
					0.21	Agriculture	0.33	C	Protected crops	Select	Corine land Ceove 2012 and 2018 CUAS 2009 (Agricultural Uses Map) Campania Region geoportale
							0.33	C	Permanent crops	Select	Corine land Ceove 2012 and 2018 CUAS 2009 (Agricultural Uses Map) Campania Region geoportale
							0.33	C	Particle emission	Map algebra	Corine land Ceove 2012 and 2018 CUAS 2009 (Agricultural Uses Map) Campania Region geoportale DEM5m Weather Maps (rainfall, ventilation)
					0.14	Animal husbandry	0.5	B	Livestok farms	Distance	TERAMO zootechnical database
							0.5	C	Livestok density	Density - Kernel Density	TERAMO zootechnical database
					0.14	Other threats	0.2	B	Dumps	Distance	Urban Atlas, classi 12100 e 13100
							0.2	B	Fuel stations	Distance	Archivio del SIN Litorale Vesuviano ARPAC
							0.2	B	Polluted sites	Distance	Archivio del SIN Litorale Vesuviano ARPAC
							0.2	B	Treatment plants	Distance	Archivio del SIN Litorale Vesuviano ARPAC
							0.2	B	Quarries	Distance	Archivio del SIN Litorale Vesuviano ARPAC
			0.36	WILDFIRES	1	Wildfires	0.75	C	Post-fire tree stability	Flow Direction	DEM5m Map PdP n° A12.2 Map PdP n° A13.1
							0.25	C	Re-burning probability	Processed by Hydrologists team	Processed by Hydrologists team
			0.36	HYDROLOGY	1	Hazard analysis	1	C	Post-fire hydrological hazard	Processed by Hydrologists team	Processed by Hydrologists team
	0.5	VALUES	0.28	CONSTRAINTS	1	Administrative constraints	0.5	B	Protected natural areas	Extract - Overlay - Union - Merge	Map PdP n° P.22b Inquadramento strutturale e aree contigue Map PdP n° P.22d Zone di tutela e unità di paesaggio
							0.5	B	Park zoning	Reclassify	Map PdP n° P.22b Map PdP n° P.22d
			0.44	BIODIVERSITY	1	Characters	0.25	B	Vegetation type	Reclassify	Map PdP n°A6.1a
							0.17	B	Wildlife corridors	distance	Map PdP n°A8.1a (1:10.000)
							0.33	B	Wildlife Habitat	Reclassify	Map PdP n°A9.1
							0.25	B	Forest type	Reclassify	Map PdP n°A9.2
			0.28	NATURALITY	1	Characters	0.63	B	Naturality index	Reclassify	Map PdP n°A12.1
							0.38	B	Naturality environments	Reclassify	Map PdP n°A12.1
FUNDAMENTAL 3	0.27	PRESSURES	0.3	ANTHROPIC	0.4	Population	0.5	C	Absolute population	Join	ISTAT - 11° Population Census (2011) Administrative Boundary - Campania Region geoportale Corine Land Cover 2012 and 2018
							0.5	C	Human index	Density - Human index (Kernel Density)	ISTAT - 11° Population Census (2011) Administrative Boundary - Campania Region geoportale CTR 2005 (Regional technical Map)
					0.07	Urban areas	1	C	Built-up residential areas	Extract - Density	CTR 2005 (Regional technical Map)
					0.27	Industry	1	B	Industrial and commercial settlements	Distance	Urban Atlas, classes 12100 e 13100
					0.27	Other factors	0.2	B	Dumps	Distance	SIN Litorale Vesuviano database ARPAC database
							0.2	B	Fuel stations	Distance	SIN Litorale Vesuviano database ARPAC database
							0.2	B	Polluted sites	Distance	SIN Litorale Vesuviano database ARPAC database
							0.2	B	Treatment plants	Distance	SIN Litorale Vesuviano database ARPAC database
							0.2	B	Quarries	Distance	SIN Litorale Vesuviano database ARPAC database
			0.35	WILDFIRES	1	Wildfires 2017	1	C	Severity map	Processed by Hydrologists team	Processed by Hydrologists team
			0.35	HYDROLOGY	1	Post-fire hydrological hazard	1	C	Hydrological hazard	Processed by Hydrologists team	Processed by Hydrologists team
	0.73	OPPORTUNITIES	0.14	ANIMAL HUSBANDRY	1	Animal husbandry facilities	0.5	C	Livestok farms	Distance	TERAMO zootechnical database
							0.5	B	Livestok density	Kernel Density	TERAMO zootechnical database
			0.11	TRANSPORT FACILITIES	1	Mobility network		B	Local roads network	Line density	Railways and roads Campania Region geoportale
			0.18	CONSTRAINTS	1	Nature protectection system	0.5	B	Protected natural areas	Extract - Overlay - Union - Merge	Map PdP n° P.22b Map PdP n° P.22d
							0.5	B	Park zoning	Reclassify	Map PdP n° P.22b Map PdP n° P.22d
			0.29	LAND USE	1	Productivity factors	0.5	B	Land capability	Reclassify	website: https://www.scienzadelsuolo.org/_docs/newsletter/luglio2019/2_Bonfante_NL9-Newsletter_SISS_06_2019.pdf
							0.5	B	Agricultural areas	Extract -Reclassify	Corine land Ceove 2012 and 2018 CUAS 2009 (Agricultural Uses Map) Campania Region geoportale
			0.11	QUALITY CERTIFICATIONS	1	Quality certifications	1	B	Protected designation wine areas	Extract	Campania Region geoportale
			0.18	FORESTRY PRODUCTION	1	Productions	1	B	Forestry production	Reclassify	Corine land Ceove 2012 and 2018 CUAS 2009 (Agricultural Uses Map) Campania Region geoportale
