# Supplementary material
Source: MDPI journal article supplement (https://www.mdpi.com/2073-445X/11/7/1024)

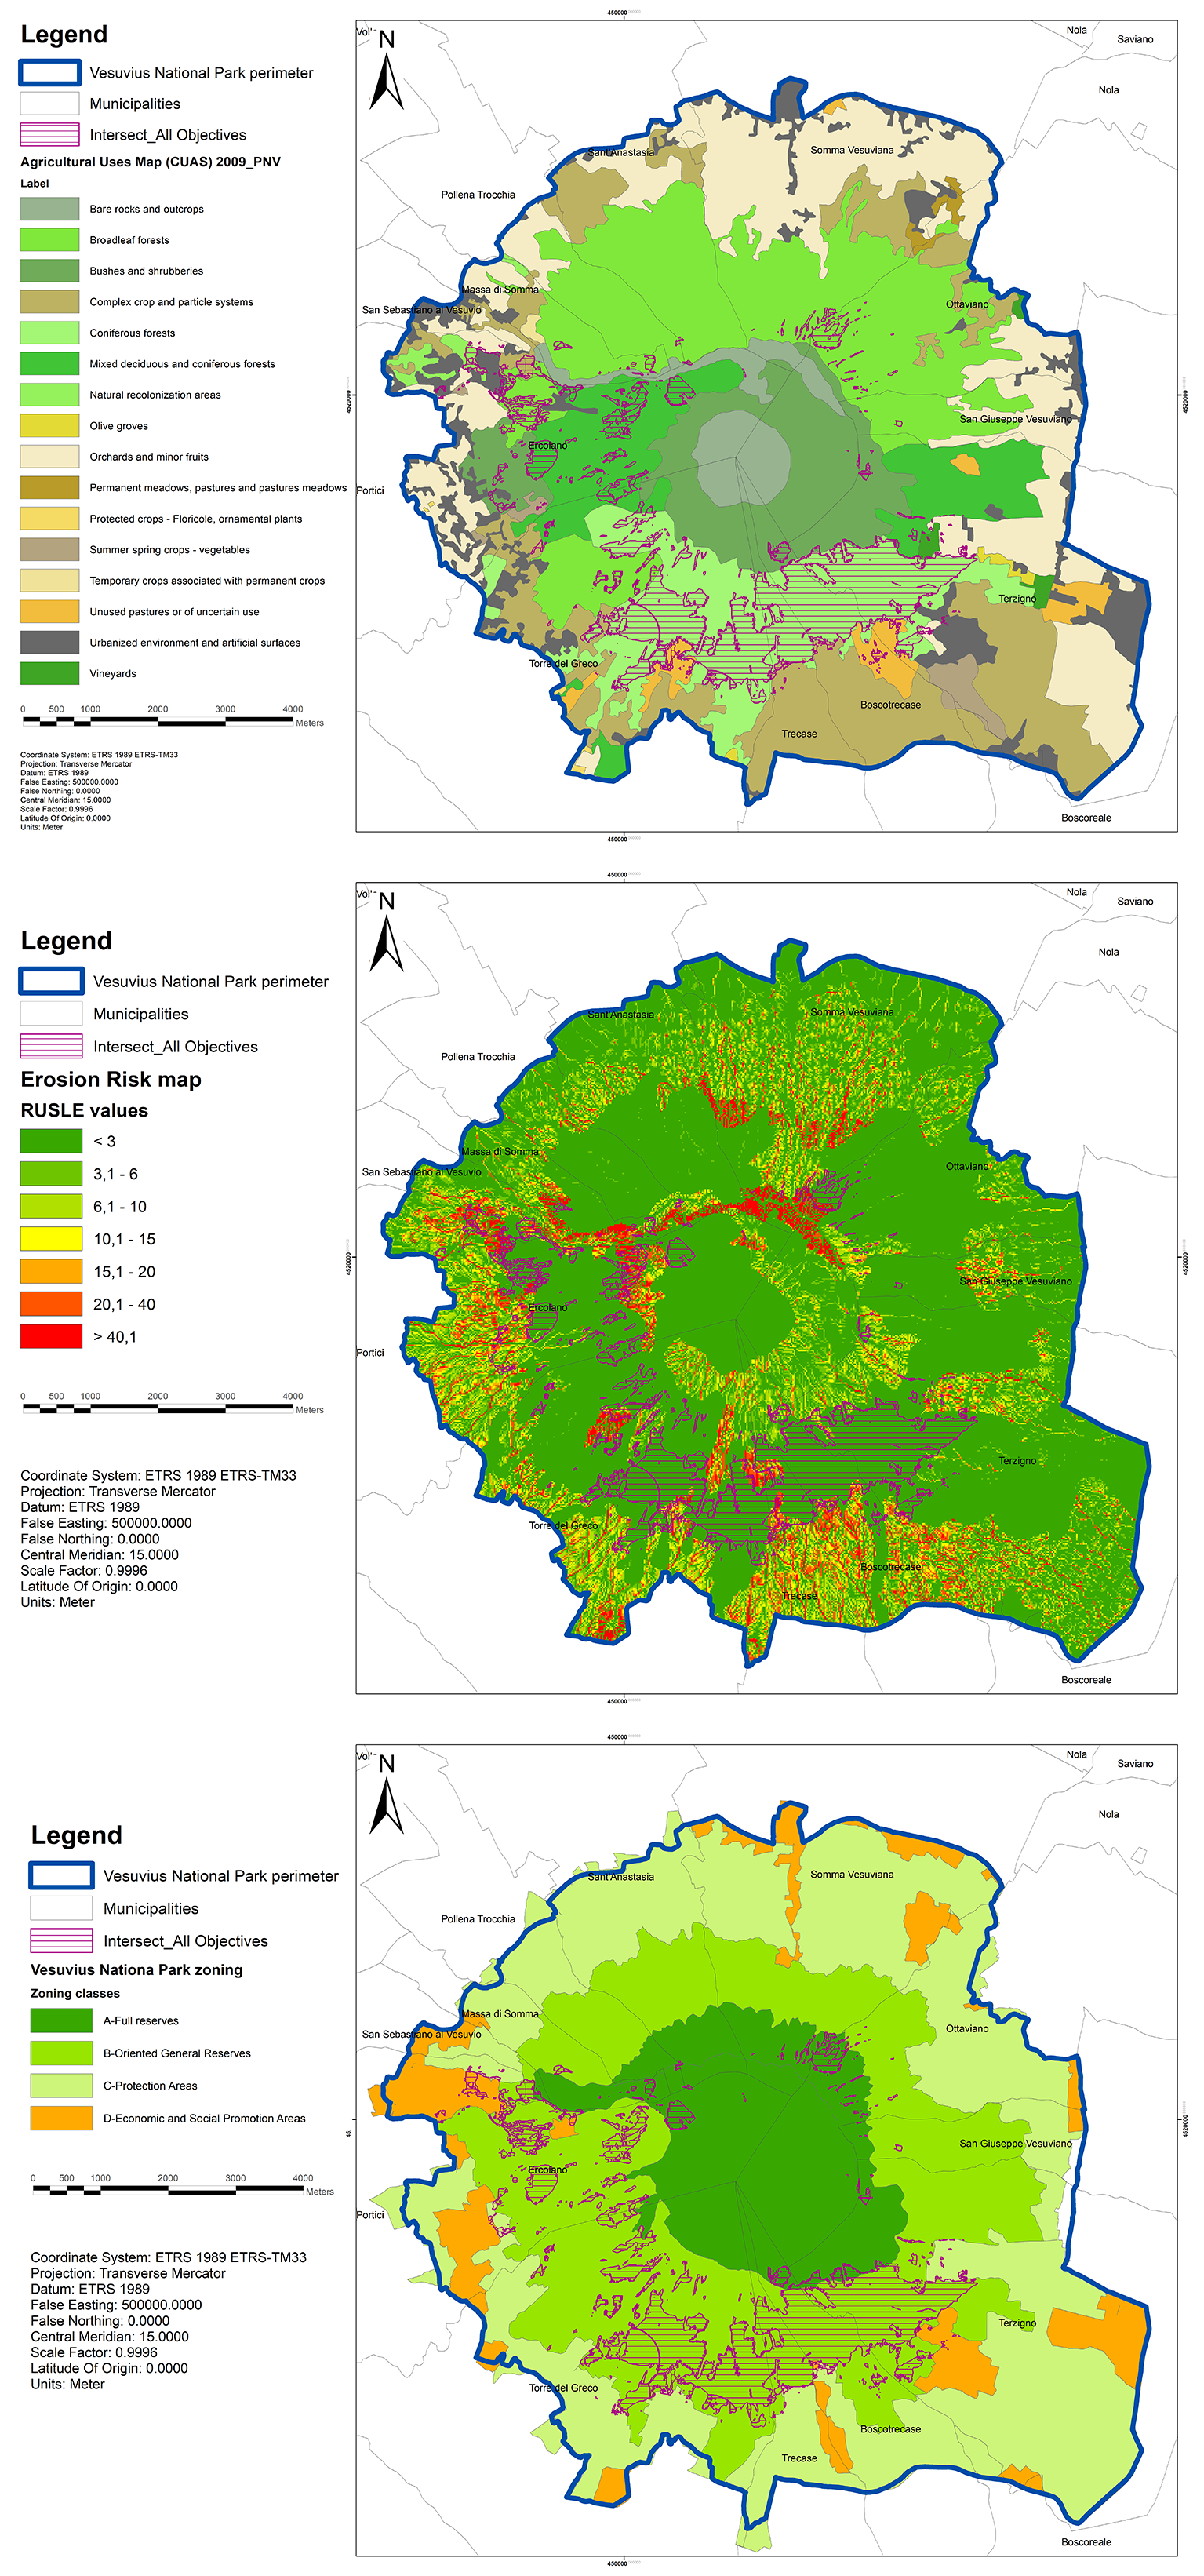

Supplement: s1 [file s1 › Annex_C.tif]

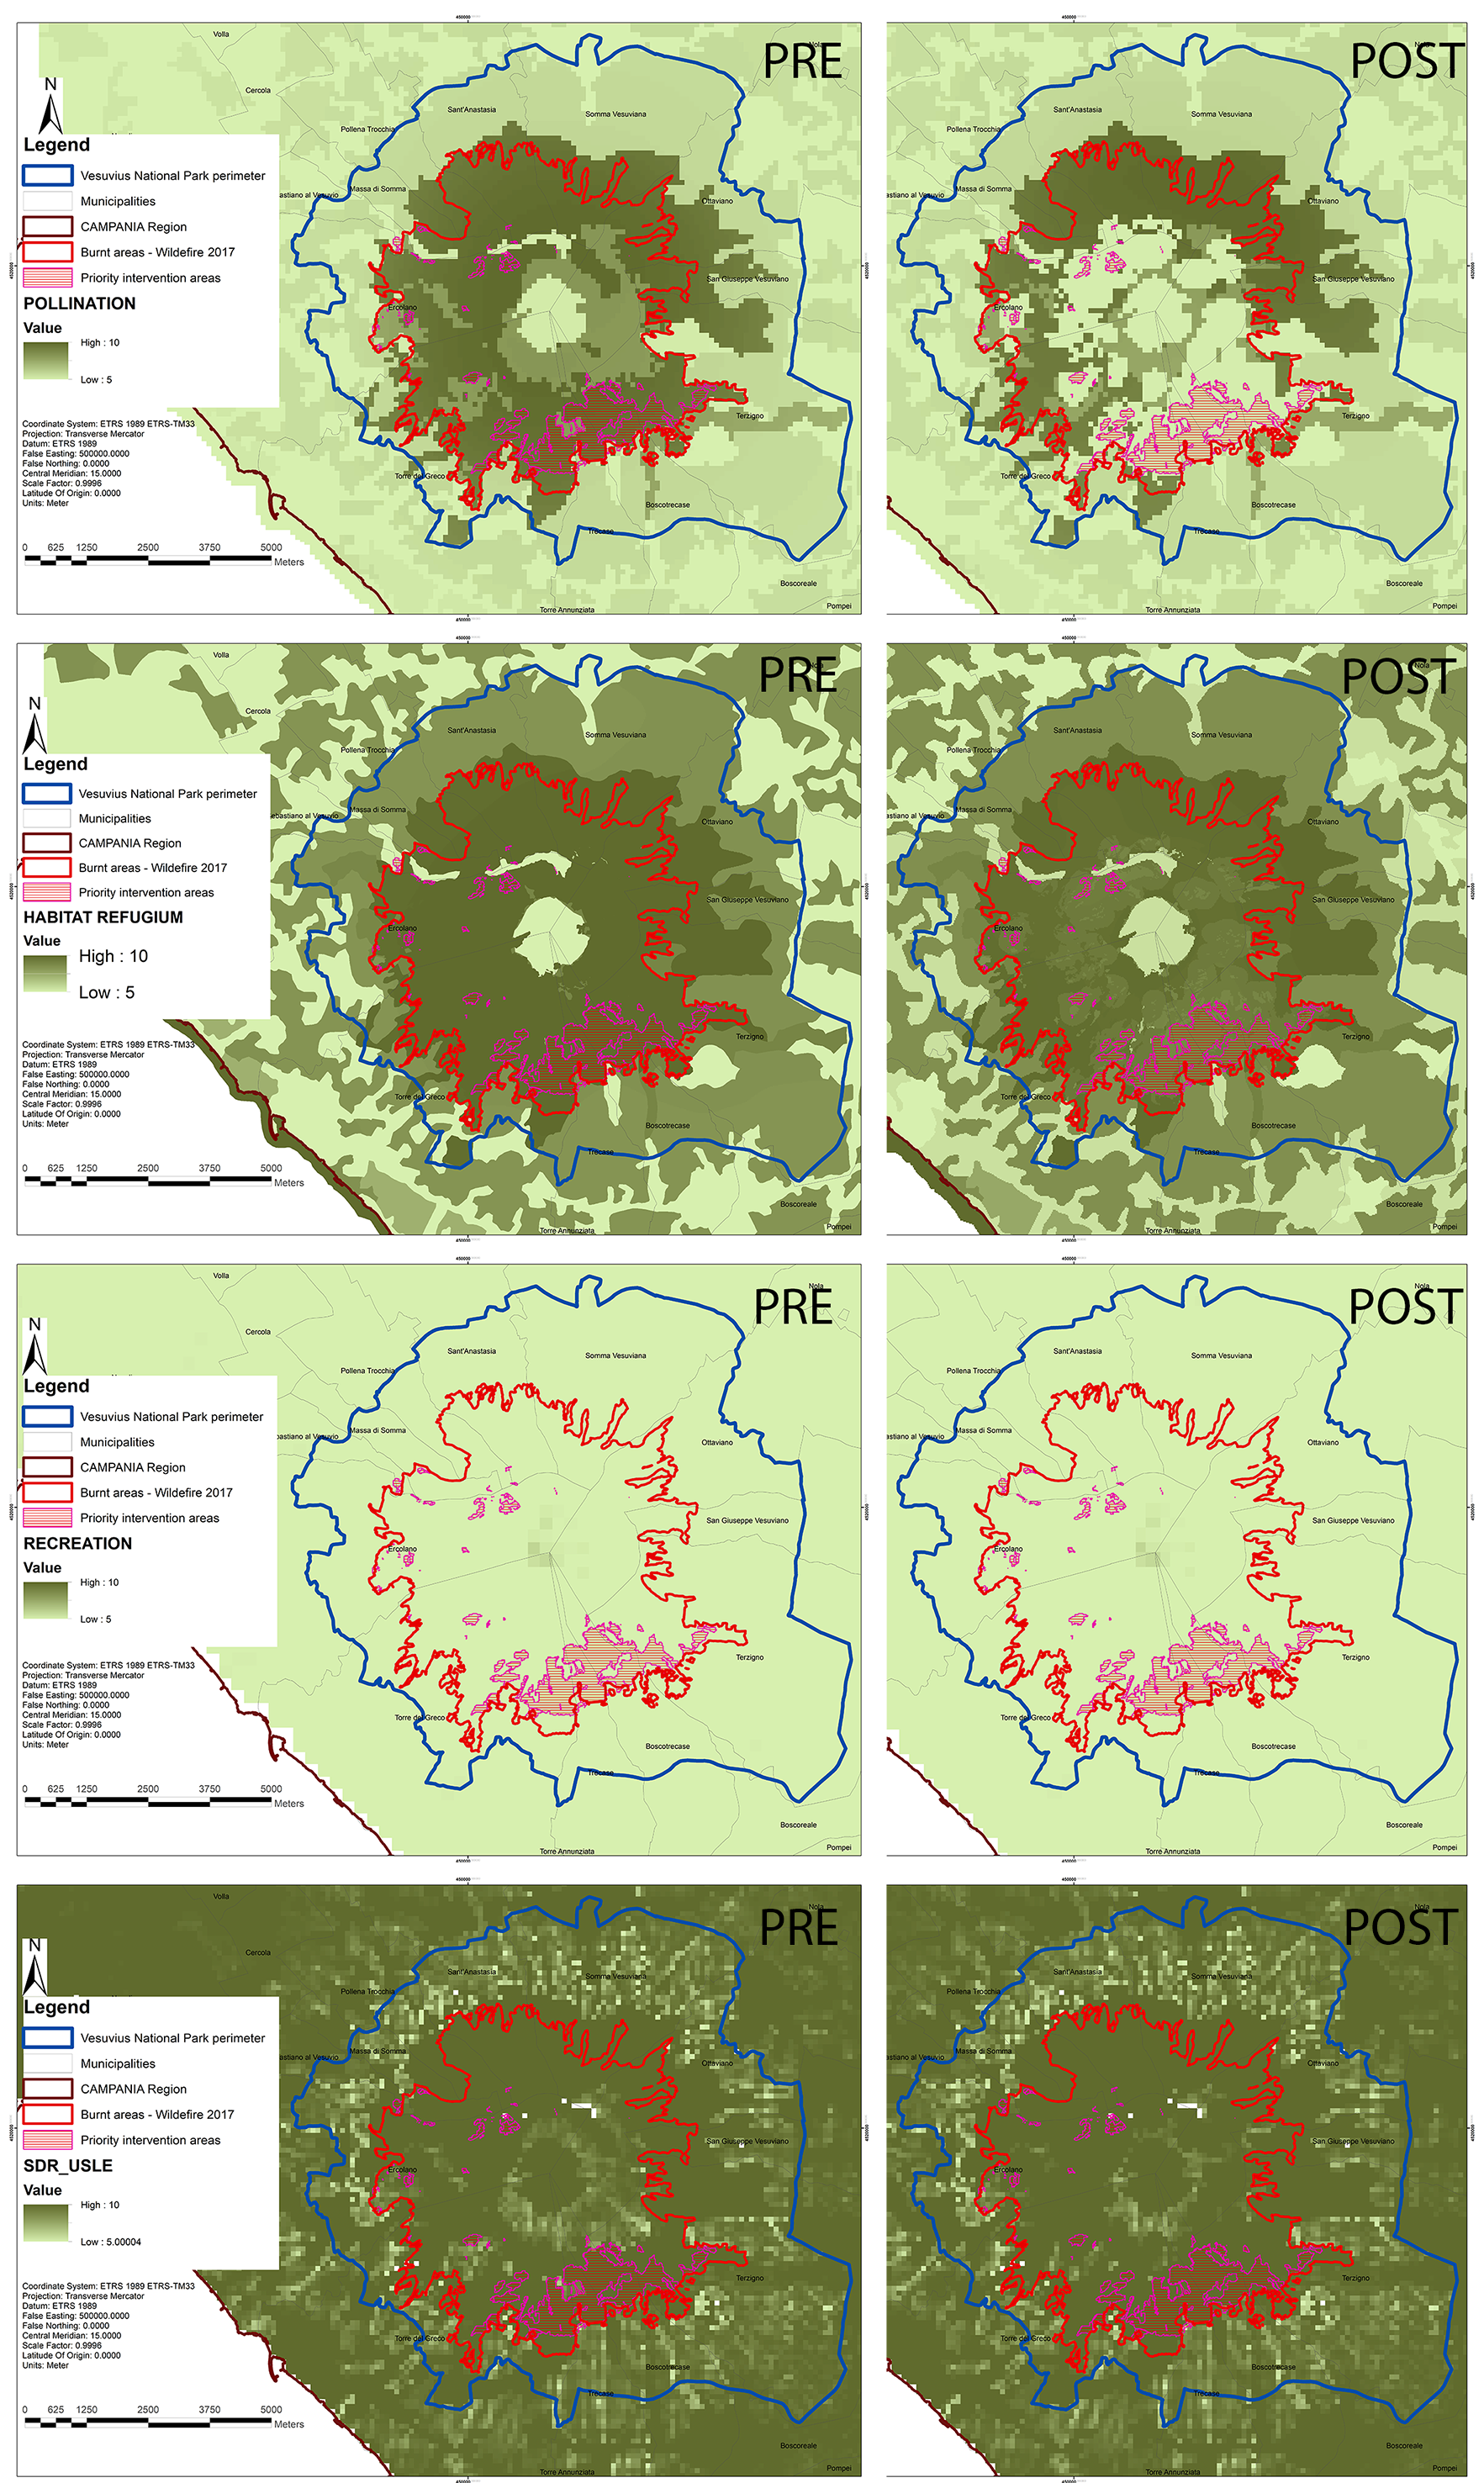

Supplement: s1 [file s1 › Annex_D.tif]
